# Supplementary material for: Synthesis and characterization of luminescent cadmium selenide/zinc selenide/zinc sulfide cholinomimetic quantum dots
Source: Royal Society of Chemistry journal article supplement (doi:10.1039/c2nr30713h), 2012-01-01
Supplement: c2nr30713h.pdf [file c2nr30713h.pdf]

## Supporting Information

### Synthesis and Characterization of Luminescent Cadmium Selenide/Zinc Selenide/Zinc Sulfide Cholinomimetic Quantum Dots

by

**Claire Gégout,<sup>a</sup> Maria L. McAtee,<sup>a</sup> Nichole M. Bennett,<sup>a</sup>  
L. M. Viranga Tillekeratne<sup>\*a,b,c</sup> and Jon R. Kirchhoff<sup>\*a,b,c</sup>**

<sup>a</sup>Department of Chemistry, College of Natural Sciences and Mathematics

<sup>b</sup>Department Medicinal and Biological Chemistry, College of Pharmacy

<sup>c</sup> School of Green Chemistry and Engineering

University of Toledo, 2801 West Bancroft Street, Toledo, OH 43606

Corresponding Author email: [jon.kirchhoff@utoledo.edu](mailto:jon.kirchhoff@utoledo.edu)

## Supplementary Materials: NMR Spectra

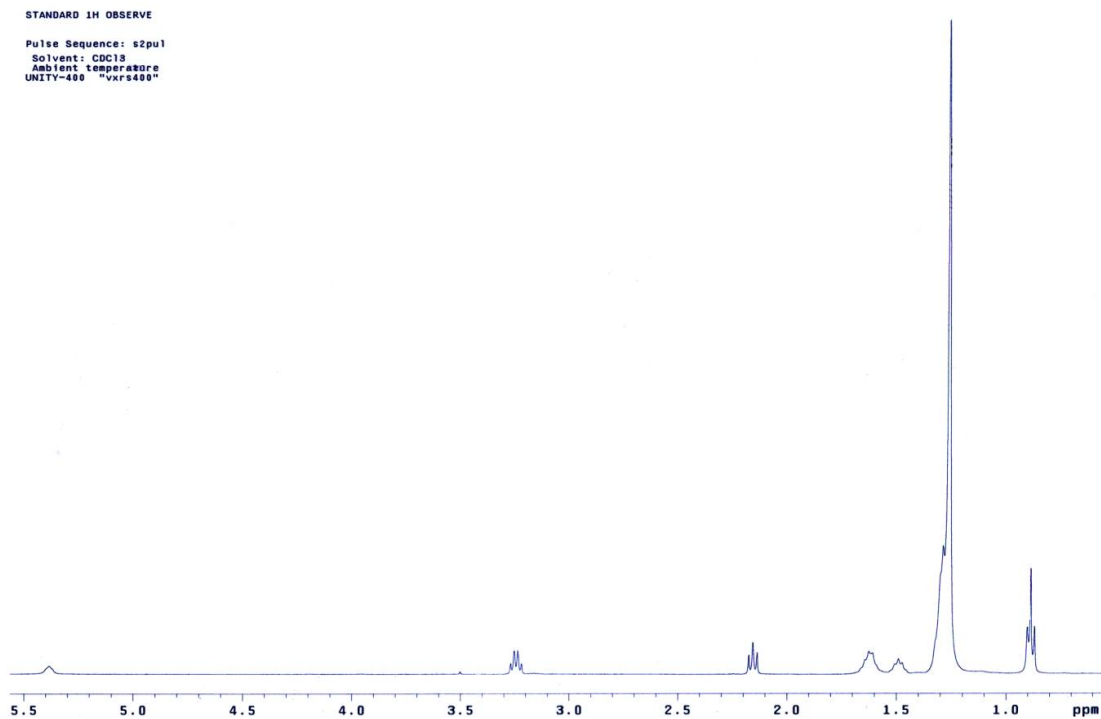

Figure S1.  $^1\text{H}$ -NMR of the non water-soluble QDs (400 MHz, in  $\text{CDCl}_3$ )

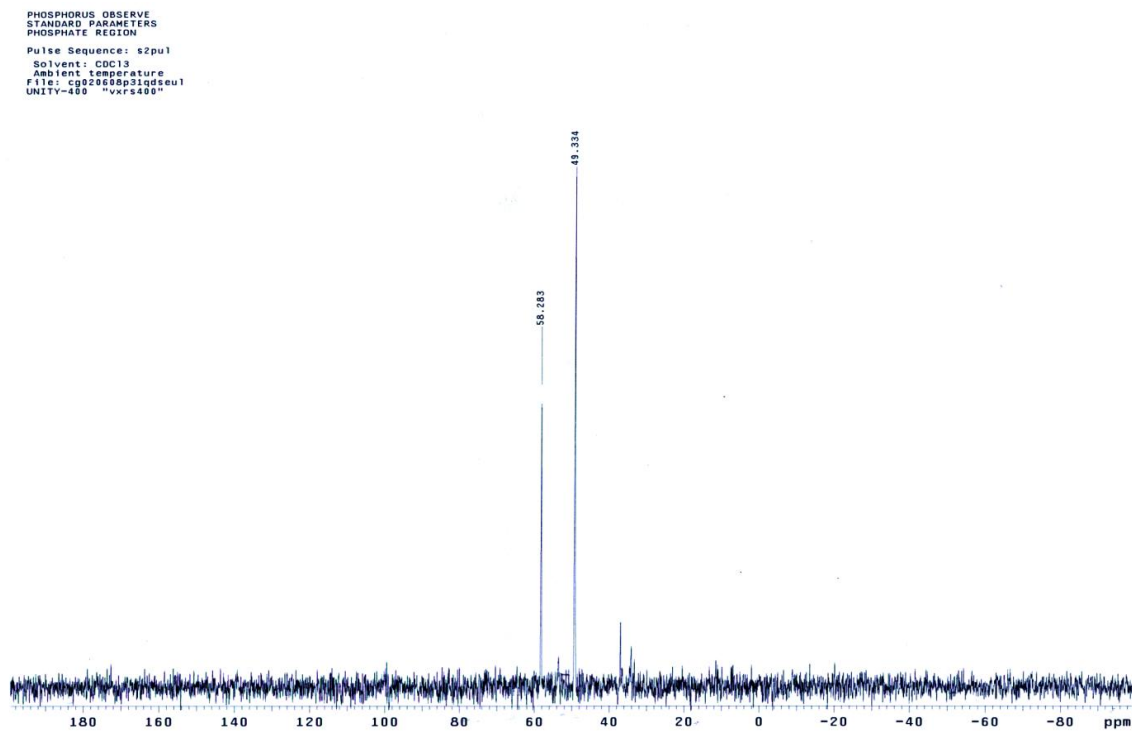

Figure S2.  $^{31}\text{P}$ -NMR of the non water-soluble QDs (400 MHz, in  $\text{CDCl}_3$ )

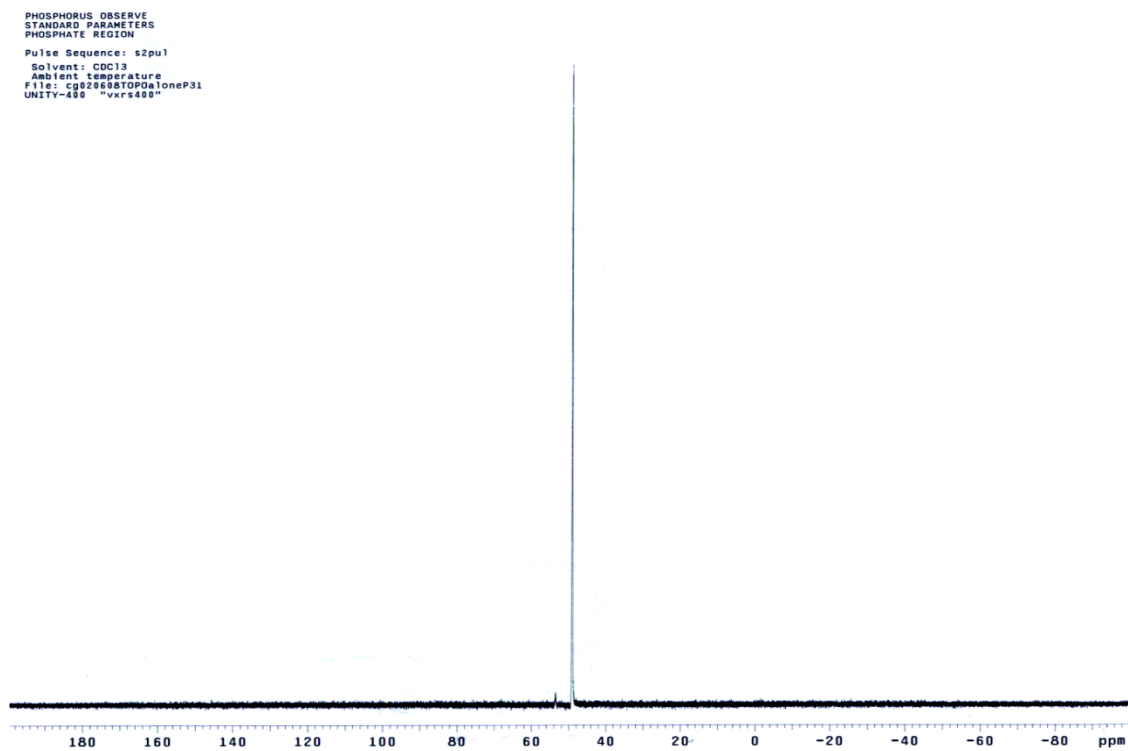

Figure S3. <sup>31</sup>P-NMR of TOPO (400 MHz, in CDCl<sub>3</sub>)

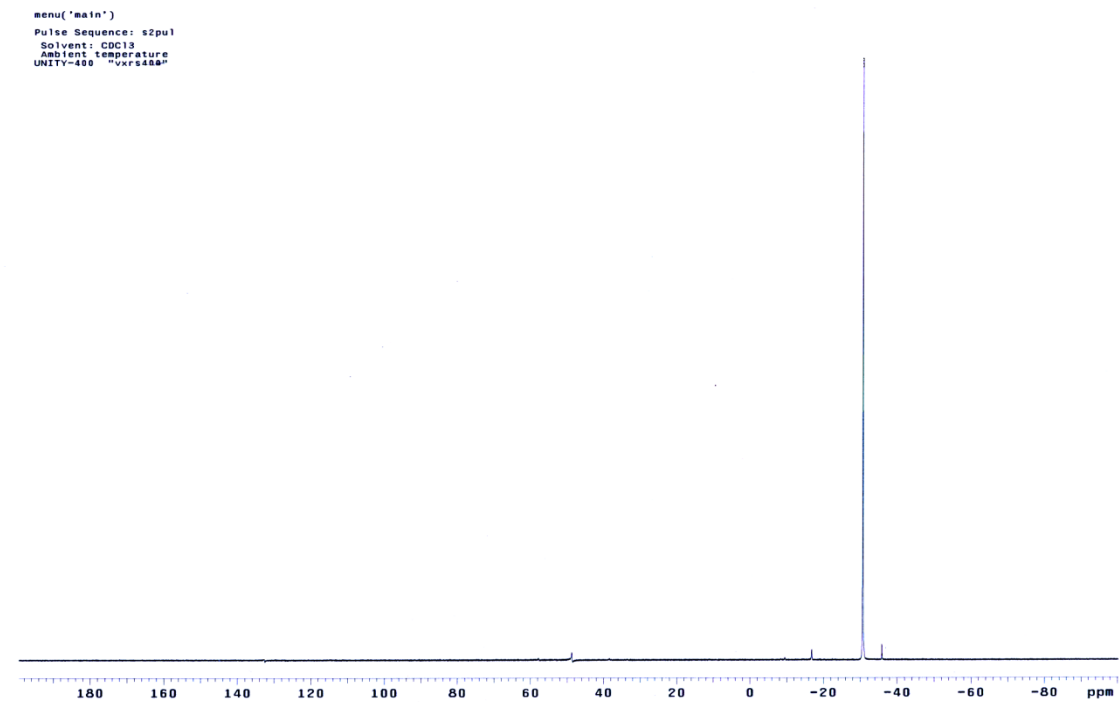

Figure S4. <sup>31</sup>P-NMR of Fresh TOP (400 MHz, in CDCl<sub>3</sub>)

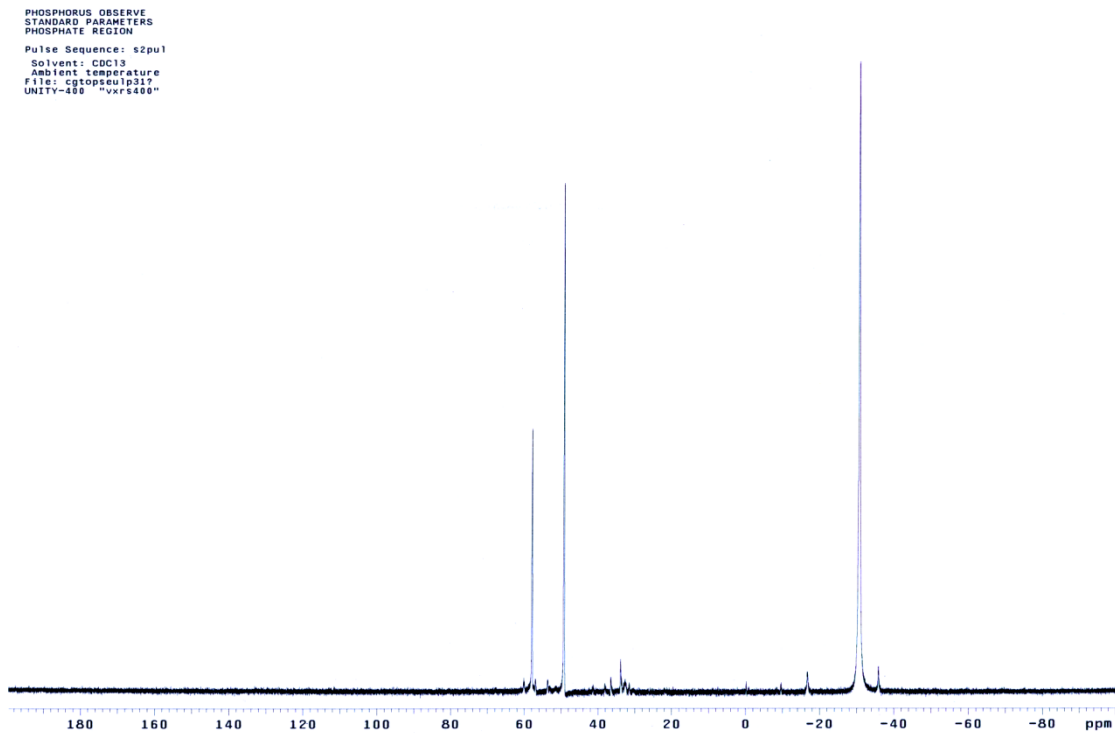

Figure S5:  $^{31}\text{P}$ -NMR of TOP after two days of exposure to air (400 MHz, in  $\text{CDCl}_3$ )

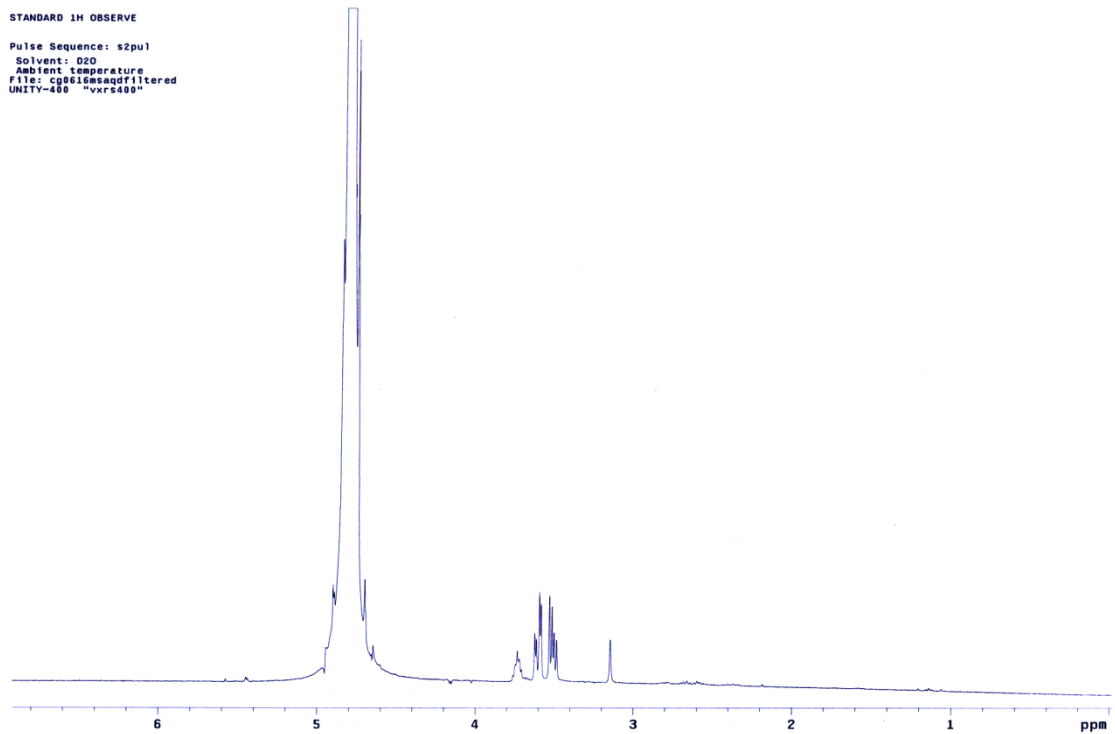

Figure S6.  $^1\text{H}$ -NMR of the water-soluble QDs (400 MHz, in  $\text{D}_2\text{O}$ )

STANDARD 1H OBSERVE  
Pulse Sequence: s2pu1  
Solvent: D2O  
Ambient temperature  
File: cg061005agofiltered  
UNITY-400 "vxrs00"

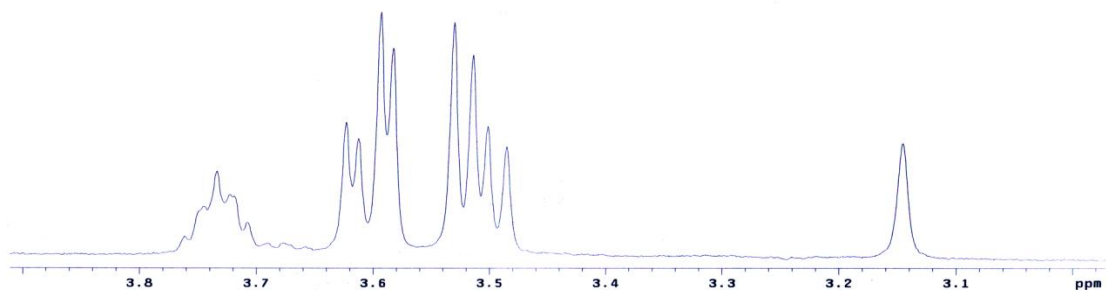

Figure S7. <sup>1</sup>H-NMR of the water-soluble QDs (400 MHz, in D<sub>2</sub>O)

PHOSPHORUS OBSERVE  
STANDARD PARAMETERS  
PHOSPHATE REGION  
Pulse Sequence: s2pu1  
Solvent: D2O  
Ambient temperature  
UNITY-400 "vxrs400"

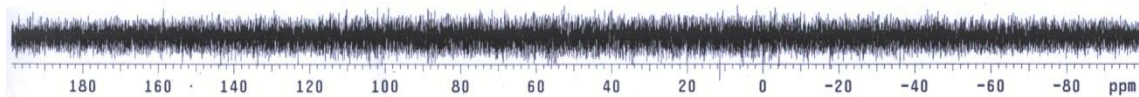

Figure S8. <sup>31</sup>P-NMR of the water-soluble QDs (400 MHz, in D<sub>2</sub>O)

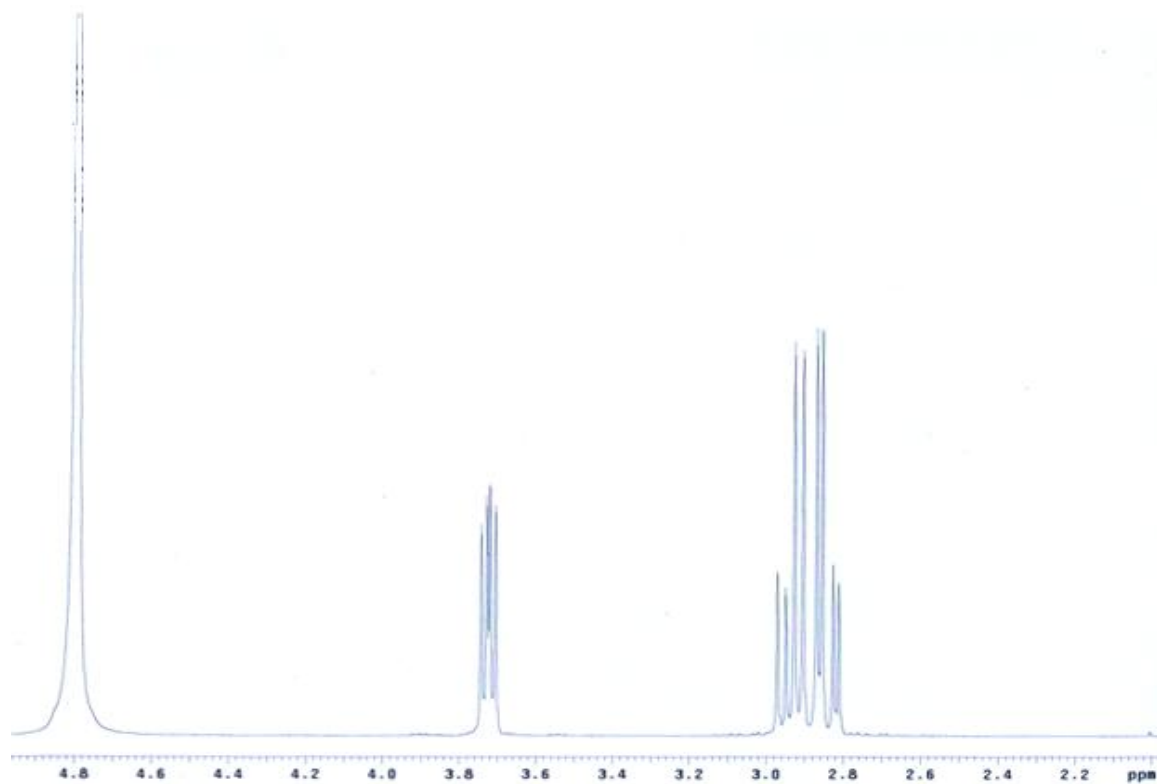

Figure S9.  $^1\text{H-NMR}$  of MSA (400 MHz, in  $\text{D}_2\text{O}$ )

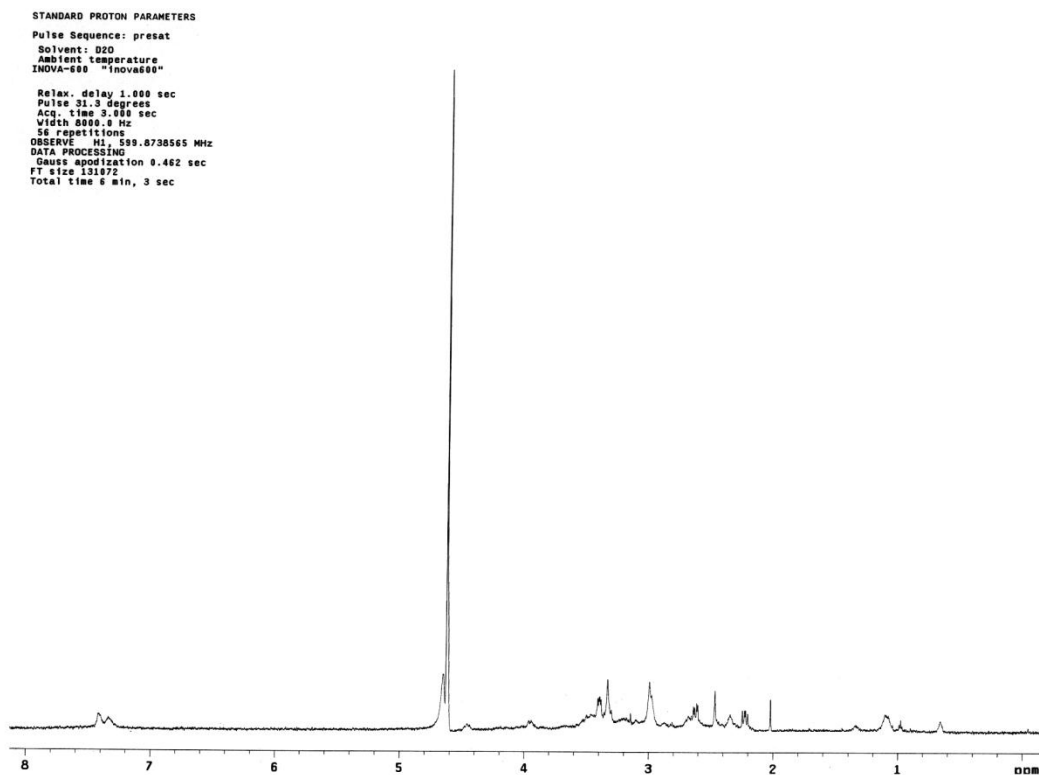

Figure S10.  $^1\text{H-NMR}$  of the water-soluble QDs bound with the HC-15 analogue (600 MHz, in  $\text{D}_2\text{O}$ ). For this spectrum, the peak for water was burned.
